# Supplementary material
Source: PubMed Central journal article supplement (PMC4058323)
Supplement: NIHMS580055-supplement-supplement_1.pdf [file NIHMS580055-supplement-supplement_1.pdf]

**Supplemental Table E1. Questions regarding asthma and wheezing-related problems used for the study, NHANES 2005-2006**

Has a doctor or other health professional ever told that (you have/s/he/SP\* has) asthma?

In the past 12 months (have you/ has SP) had wheezing or whistling in (your/his/her) chest?

In the past 12 months, (have you/ has SP) taken medication, prescribed by a doctor, for wheezing or whistling?

In the past 12 months has (your/ SP's) chest sounded wheezy during or after exercise or physical activity?

During the past 12 months, how many days of work or school did (you/ SP) miss due to wheezing or whistling?

\* SP – survey participant
